# Supplementary material for: Comparison of Modified Above-Knee and Conventional Surgery with the Stripping of the Great Saphenous Vein of Varicose Veins of the Lower Extremities: A Retrospective Study
Source: Hindawi journal article supplement (doi:10.1155/2022/7730960), 2022-01-12
Supplement: f1 [file 7730960.f1.doc]

**Supplement table 1 Comparison results of obesity on surgical of patients.**

|  | Obese  (BMI > 28.0) | Nonobese  (BMI ≤ 28.0) | χ2 | *P* value |
| --- | --- | --- | --- | --- |
| Injury of saphenous nerve (%) | 21 (9.9) | 43 (20.2) | 0.021 | 0.885 |
| Mild | 21 (9.9) | 39 (18.8) | 0.114 | 0.736 |
| Severe | 0 (0.0) | 4 (1.9) | - | 0.307 |
| Surgical site infection (%) | 2 (0.9) | 2 (0.9) | 0.035 | 0.815 |
| Venous thromboembolism (%) | 1 (0.5) | 1 (0.5) | 0.000 | 1.000 |
| Subcutaneous hematoma (%) | 6 (2.8) | 13 (6.1) | 0.021 | 0.885 |
| Thrombophlebitis superficial (%) | 11 (5.2) | 22 (10.3) | 0.001 | 0.976 |
| Varicose veins recurrent (%) | 35 (16.4) | 57 (26.8) | 1.296 | 0.255 |
